# Supplementary material
Source: publisher site journal article supplement (https://www.spandidos-publications.com/4704/downloadSupplementary)

Figure S1. Representative image of HE staining in sham group (scale bar=50  $\mu$ m). HE, hematoxylin and eosin.

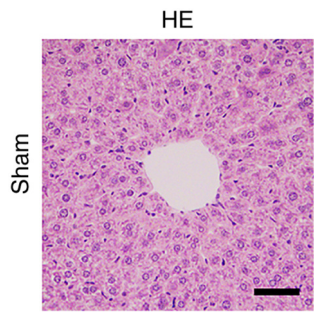

Figure S2. Representative image of immunohistochemical staining for PCNA in sham group. (scale bar=50  $\mu$ m). PCNA, proliferating cell nuclear antigen.

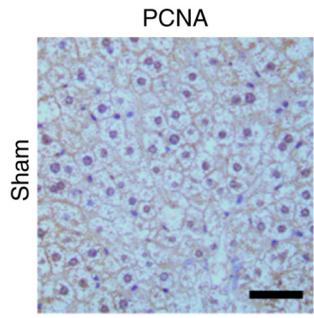

Figure S3. RT-PCR analysis detecting the mRNA level of HGF. Three independent experiments were pooled in the statistical analysis. All data are expressed as the means  $\pm$  standard deviation. \* $P < 0.05$ , \*\* $P < 0.01$ . HGF, hepatocyte growth factor.

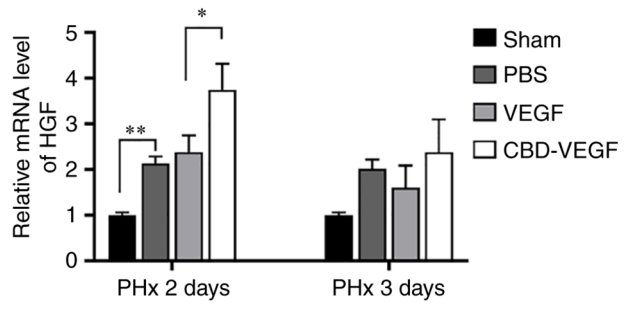

Supplement: Supplementary file 1 [file downloadSupplementary]
